# Supplementary material for: TMB and TCR Are Correlated Indicators Predictive of the Efficacy of Neoadjuvant Chemotherapy in Breast Cancer
Source: PubMed Central journal article supplement (PMC8688823; doi:10.3389/fonc.2021.740427), 2021-12-07

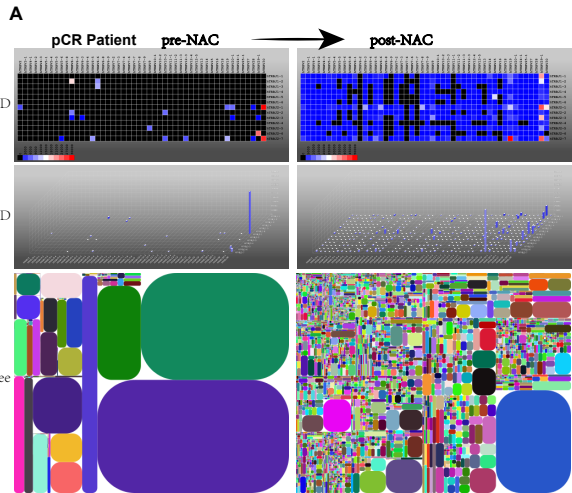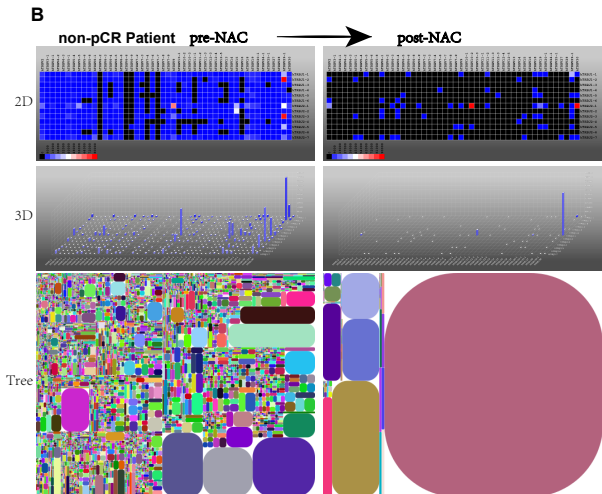

Supplement: DataSheet_1.pdf [file DataSheet_1.pdf]
