# Supplementary material for: TMB and TCR Are Correlated Indicators Predictive of the Efficacy of Neoadjuvant Chemotherapy in Breast Cancer
Source: PubMed Central journal article supplement (PMC8688823; doi:10.3389/fonc.2021.740427), 2021-12-07

**A**

pCR patient

pre-NAC

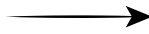

Post-NAC

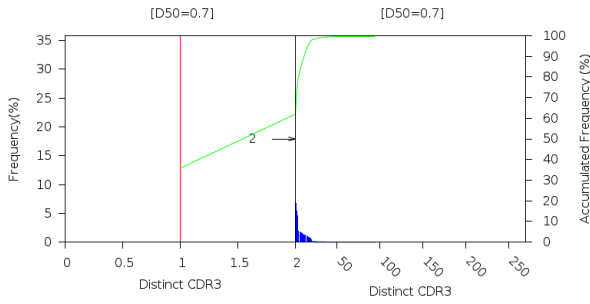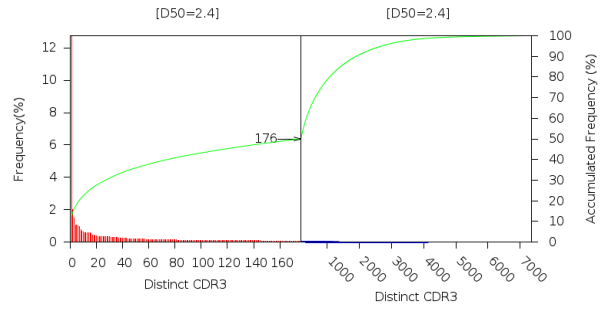**B**

non-pCR patient

pre-NAC

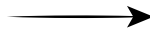

Post-NAC

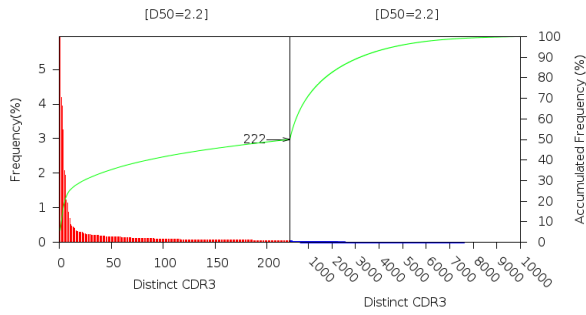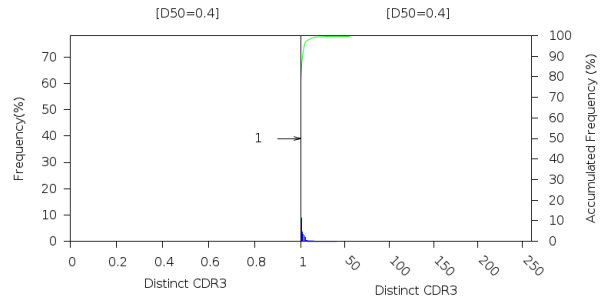

Supplement: DataSheet_2.pdf [file DataSheet_2.pdf]
