# Supplementary material for: TMB and TCR Are Correlated Indicators Predictive of the Efficacy of Neoadjuvant Chemotherapy in Breast Cancer
Source: PubMed Central journal article supplement (PMC8688823; doi:10.3389/fonc.2021.740427), 2021-12-07
Supplement: DataSheet_3.pdf [file DataSheet_3.pdf]

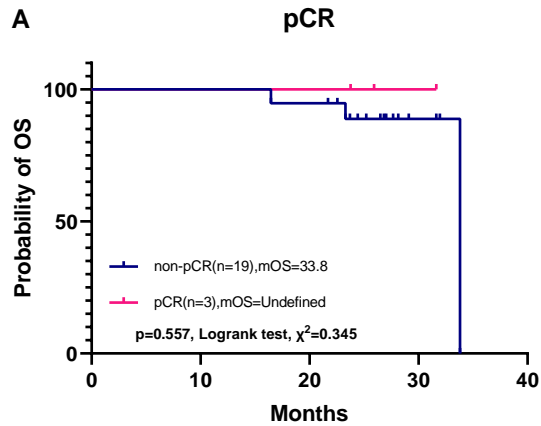

| Num at Risk | 0  | 10 | 20 | 30 | 40 |
|-------------|----|----|----|----|----|
| pCR         | 3  | 3  | 3  | 1  | 0  |
| non-pCR     | 19 | 19 | 18 | 3  | 0  |

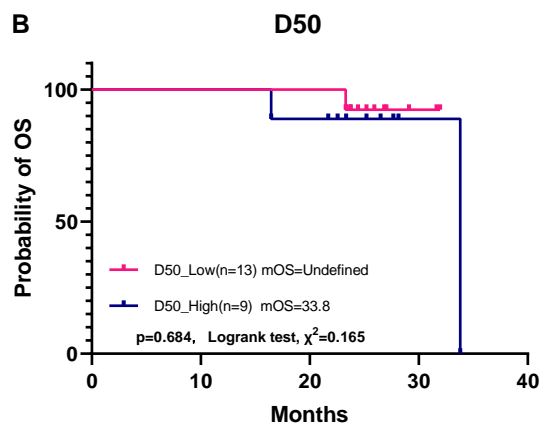

| Num at Risk | 0  | 10 | 20 | 30 | 40 |
|-------------|----|----|----|----|----|
| D50 Low     | 13 | 13 | 13 | 3  | 0  |
| D50 High    | 9  | 9  | 8  | 1  | 0  |

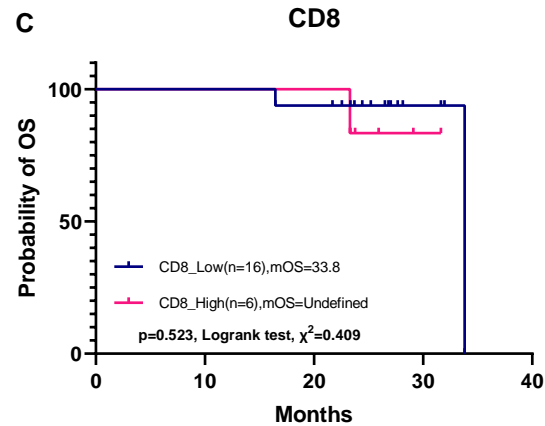

| Num at Risk | 0  | 10 | 20 | 30 | 40 |
|-------------|----|----|----|----|----|
| CD8 High    | 6  | 6  | 6  | 1  | 0  |
| CD8 Low     | 16 | 16 | 15 | 3  | 0  |

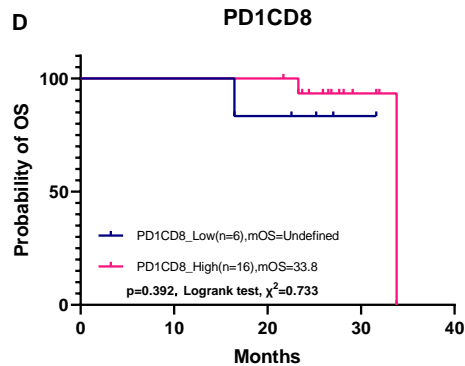

| Num at Risk | 0  | 10 | 20 | 30 | 40 |
|-------------|----|----|----|----|----|
| PD1CD8 High | 16 | 16 | 16 | 3  | 0  |
| PD1CD8 Low  | 6  | 6  | 5  | 1  | 0  |

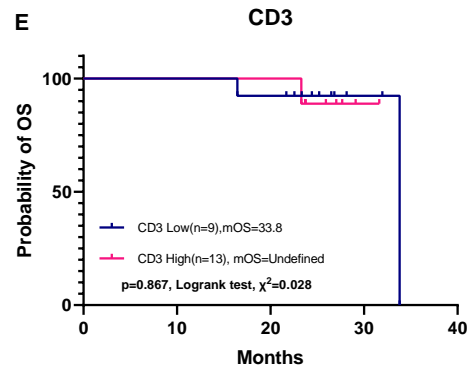

| Num at Risk | 0  | 10 | 20 | 30 | 40 |
|-------------|----|----|----|----|----|
| CD3 High    | 9  | 9  | 9  | 2  | 0  |
| CD3 Low     | 13 | 13 | 12 | 2  | 0  |

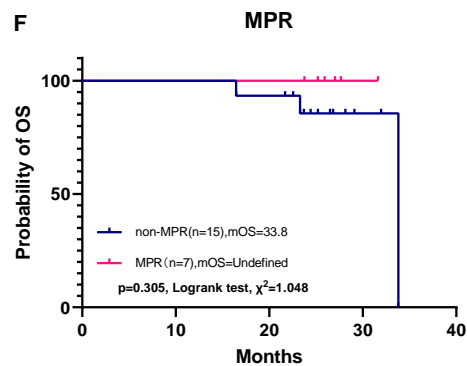

| Num at Risk | 0  | 10 | 20 | 30 | 40 |
|-------------|----|----|----|----|----|
| MPR         | 7  | 7  | 7  | 2  | 0  |
| non-MPR     | 15 | 15 | 14 | 2  | 0  |

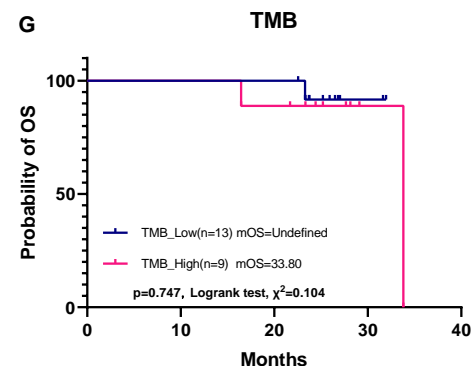

| Num at Risk | 0  | 10 | 20 | 30 | 40 |
|-------------|----|----|----|----|----|
| TMB Low     | 13 | 13 | 13 | 3  | 0  |
| TMB High    | 9  | 9  | 8  | 1  | 0  |
